# Supplementary material for: Hydrogels of Polycationic Acetohydrazone-Modified Phosphorus Dendrimers for Biomedical Applications: Gelation Studies and Nucleic Acid Loading
Source: PubMed Central journal article supplement (PMC6161142; doi:10.3390/pharmaceutics10030120), 2018-08-06
Supplement: pharmaceutics-10-00120-s001.pdf [file pharmaceutics-10-00120-s001.pdf]

# Supplementary Materials: Hydrogels of Polycationic Acetohydrazone-modified Phosphorus Dendrimers for Biomedical Applications: Gelation Studies and Nucleic Acid Loading

Evgeny K. Apartsin, Alina E. Grigoryeva, Audrey Malrin-Fournol, Elena I. Ryabchikova, Alya G. Venyaminova, Serge Mignani, Anne-Marie Caminade, Jean-Pierre Majoral

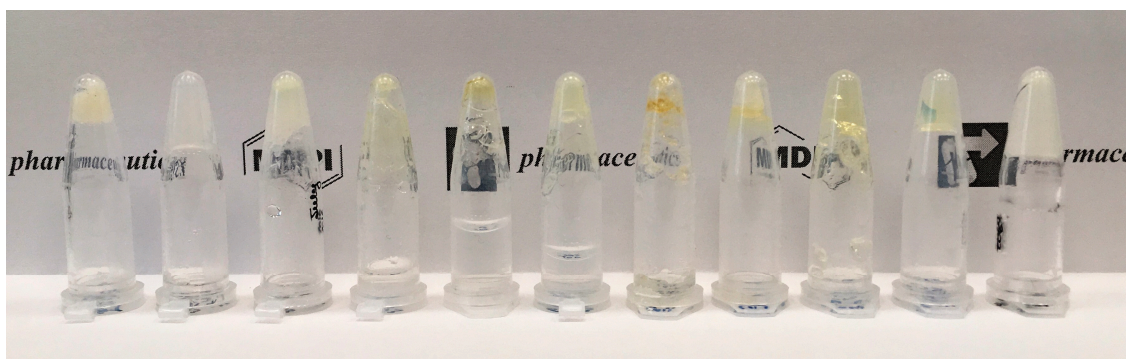

**Figure S1.** Examples of dendrimer hydrogels. From left to right: TG1@ 10% Glc in PBS; TG3@ 10% Glc in PBS; PG3@ 10% Gly in PBS; PG3@ water; PG2@ water; PG3@ 10% PEG in water; TG2@ 10% Gly in water; TG2@ 10% Gly in PBS; PG2@ 10% Gly in water; TG3@ 10% PEG in water; PG3@ 10% PEG in PBS.

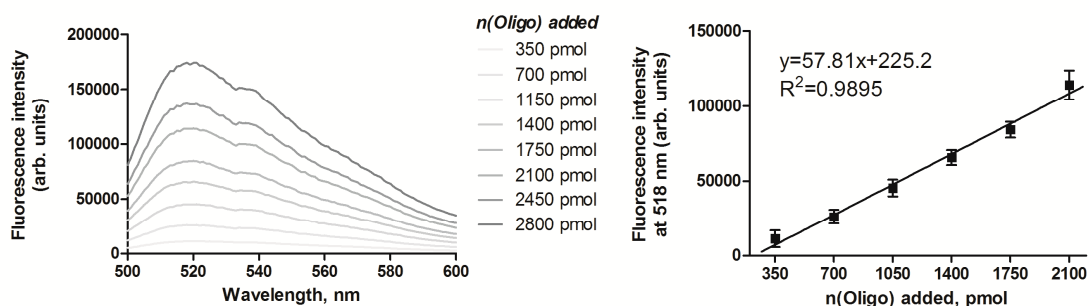

**Figure S2.** Fluorescence spectra of the oligonucleotide 5'-ACCCTGAAGTTCCGGCAAGCTG-FAM-3' (left) and calibration curve for the calculation of the amount of bound oligonucleotide plotted based on these spectra (right).
